# Supplementary material for: Impact of integrative open dialogue about complementary alternative medicine. A phase II randomized controlled trial
Source: Research Square preprint supplement (doi:10.21203/rs.3.rs-426226/v1), 2021-05-12
Supplement: Supplementary file 1 [file ad6a4c2696981956533352c2.docx]

Table 1 Baseline Sociodemographic and Clinical Characteristics (n= 112)

| Characteristics | All (n=112 ) | Intervention group (n=57) | Control group (n= 55 ) | *P* |
| --- | --- | --- | --- | --- |
| Sex  Female  Male | 72 (64.3%)  40 (35.7%) | 32 (56.1%)  25 (43.9%) | 40 (72.7%)  15 (27.3%) | 0.07 a |
| Age (years)  Mean  SD | 62.8  11.23 | 62.3  9.97 | 63.4  12.47 | 0.6 |
| Married/in a relationship  Yes  No | 89 (79.5%)  23 (20.5%) | 48 (84.2%)  9 (15.8%) | 41 (75.5%)  14 (25.5%) | 0.21 a |
| Education  High  Middle  Low  Other | 41 (36.6%)  48 (42.9%)  14 (12.5%)  9 (8.0%) | 25(43.9%)  20(35.1%)  7 (12.3%)  5 (8.8%) | 16(29%)  28(50.1%)  7 (12.7%)  4 (7.3%) | 0.33b |
| Diagnosis  Breast cancer  Prostata cancer  Lung cancer  GI cancer  Gynological (uterine+ovarian)  Pancreas | 32 (28.6%)  12 (10.7%)  32 (28.6%)  22 (19.6%)  8 (7.1%)  6 (5.4%) | 16 (28.1%)  9 (15.8%)  15 (26.3%)  11 (19.3%)  3 (5.3%)  3 (5.3%) | 16 (29.1%)  3 (5.5%)  17 (30.9%)  11 (20.0)  5 (9.1%)  3 (5.5%) | 0.62 b |
| Anticancer treatment  Curative  Palliative  Unknown | 36 (32.4%)  75 (67.6%)  1 | 19 (33.9%)  37 (66.1%)  1 | 17 (30.9%)  38 (69.1%)  0 | 0.73 a,c |
| Current treatment  Chemotherapy (chemotherapy alone, chemotherapy+antibody, chemotherapy+ radiation)  Targeted therapy  (Immunotherapy, antibody)  Other | 100 (89.3%)  7 (6.3%)  5 (4.5%) | 51 (89.5%)  3 (5.3%)  3 (5.3%) | 49 (89.1%)  4 (7.3%)  2 (3.6%) | 0.91 b |
| Attitude towards CAM  Don´t know  Against  Neutral  Positive  Very positive | 2 (1.8%)  3 (2.7%)  19 (17.3%)  55 (50%)  31 (28.2%) | 1 (1.9%)  2 (3.7%)  9 (16.7%)  22 (40.7%)  20 (37.0%) | 1 (1.8%)  1 (1.8%)  10 (17.9%)  33 (58.9%)  11 (19.6% | 0.22b |
| Use of CAM  Yes  No  Don´t know | 75 (68.2%)  35 (31,8%)  0 | 40 (74.1%)  14 (25.9%)  0 (0%) | 35 (62.5%)  21 (37.5%)  0 (0%) | 0.19a |

a Chi2-test (binære outcome)

b Fisher’s Exact test

c Based on patients with known treatment intention (i.e. n = 111)
